# Supplementary material for: Genomic assessment in Lactobacillus plantarum links the butyrogenic pathway with glutamine metabolism
Source: PubMed Central journal article supplement (PMC5698307; doi:10.1038/s41598-017-16186-8), 2017-11-21
Supplement: 41598_2017_16186_MOESM1_ESM.pdf [file 41598_2017_16186_MOESM1_ESM.pdf]

# **Genomic assessment in *Lactobacillus plantarum* links the butyrogenic pathway with glutamine metabolism**

Cristian Botta<sup>1</sup>, Alberto Acquadro<sup>1</sup>, Anna Greppi<sup>1,5</sup>, Lorenzo Barchi<sup>1</sup>, Marta Bertolino<sup>1</sup>, Luca Cocolin<sup>1</sup>, Kalliopi Rantsiou<sup>1</sup>

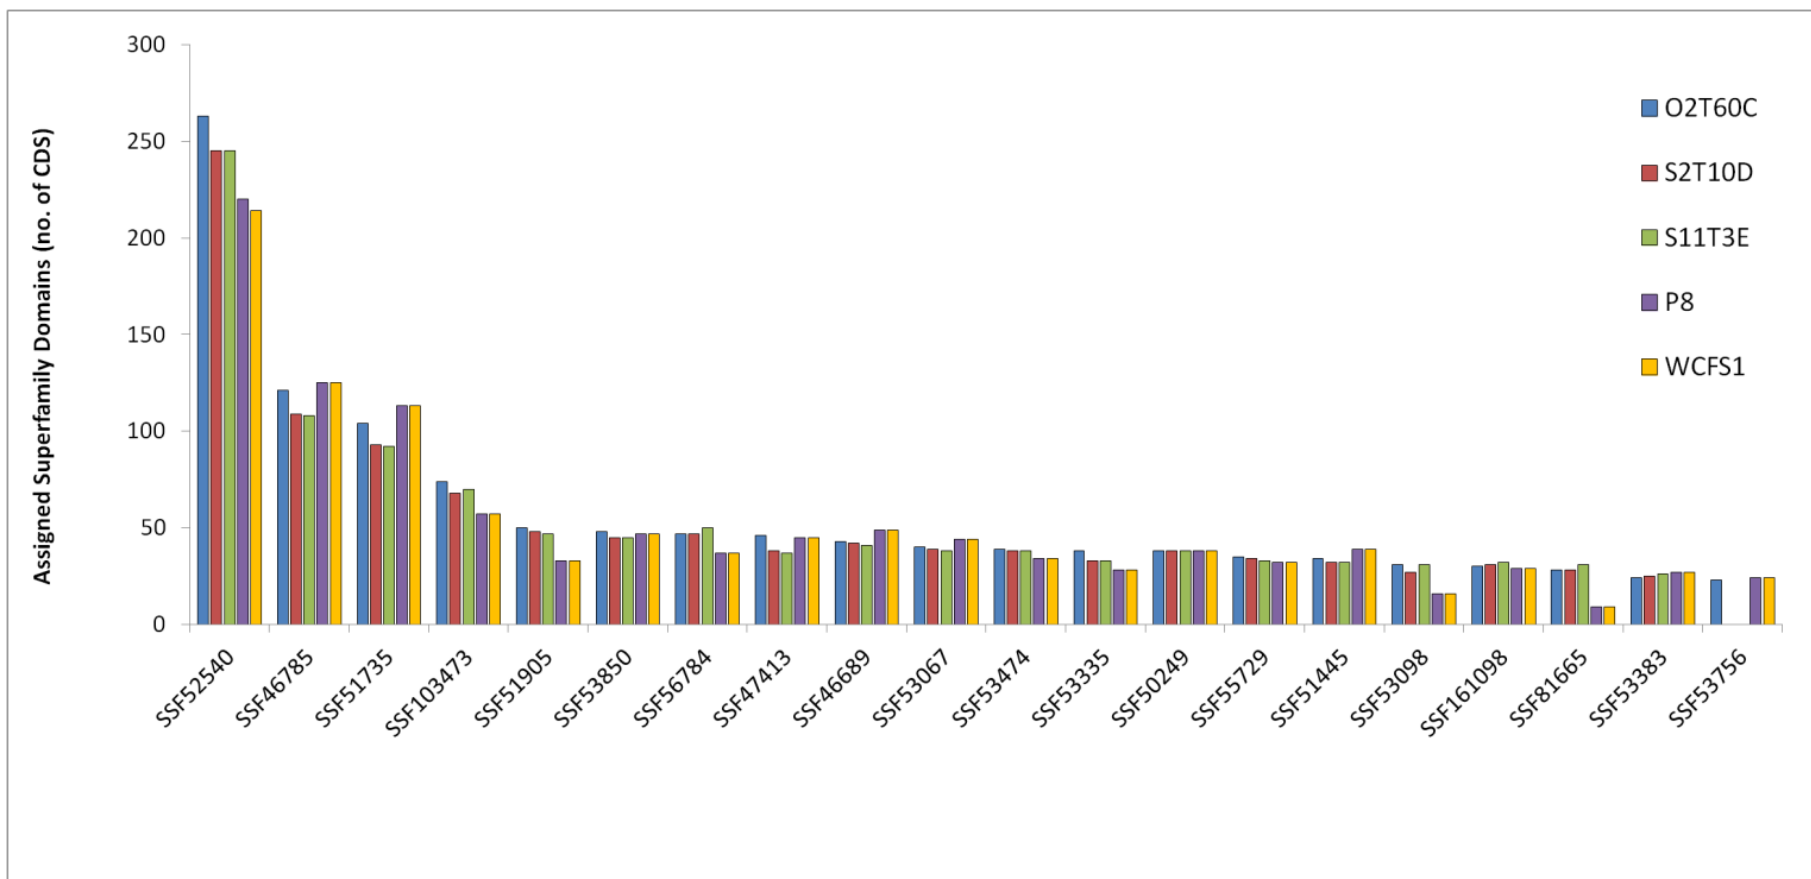

### Supplementary Figure 1.

Top 20 proteins superfamily domains identified in the three genomes (O2T60C, S2T10D and S11T3E) annotated using Interproscan pipeline, and comparison with reference *L. plantarum* genomes P8 and WCFS1 (<http://supfam.org/SUPERFAMILY/index.html>). Superfamily domains were listed in decreasing order: P-loop containing nucleoside triphosphate hydrolases (SSF52540); "Winged helix" DNA-binding domain (SSF46785); NAD(P)-binding Rossmann-fold domains (SSF51735); MFS general substrate transporter (SSF103473); FAD/NAD(P)-binding domain (SSF51905); Periplasmic binding protein-like II (SSF53850); HAD-like (SSF56784); lambda repressor-like DNA-binding domains (SSF47413); Homeodomain-like (SSF46689); Actin-like ATPase domain (SSF53067); alpha/beta-Hydrolases (SSF53474); S-adenosyl-L-methionine-dependent methyltransferases (SSF53335); Nucleic acid-binding proteins (SSF50249); Acyl-CoA N-acyltransferases (Nat) (SSF55729); (Trans)glycosidases (SSF51445); Ribonuclease H-like (SSF53098); MetI-like (SSF161098); Calcium ATPase, transmembrane domain M (SSF81665); PLP-dependent transferases (SSF53383); UDP-Glycosyltransferase/glycogen phosphorylase (SSF53756).

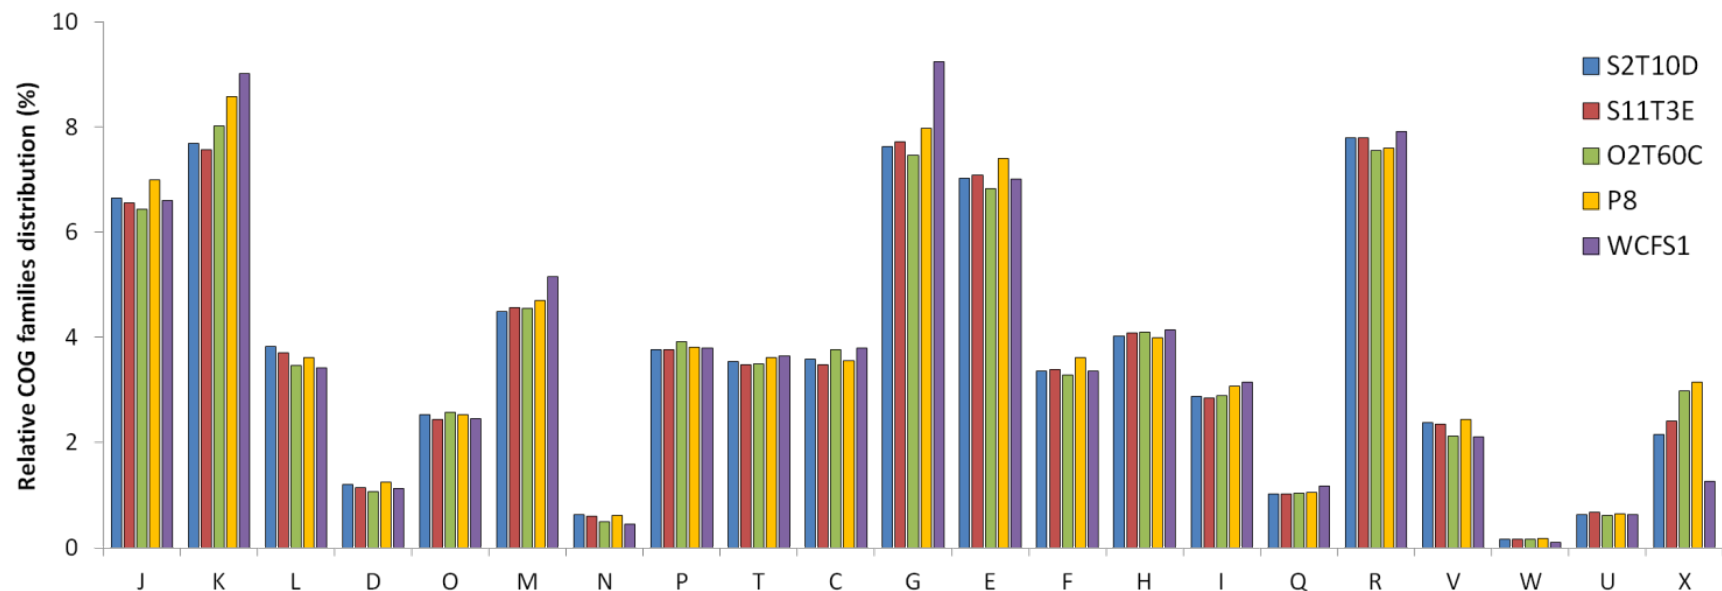

**Supplementary Figure 2.**

Distribution of COG categories in the *L. plantarum* strains S2T10D, S11T3E, O2T60C, P8, WCFS1. COG categories were listed in the following order: translation, ribosomal structure and biogenesis (J); transcription (K); DNA replication, recombination, and repair (L); cell division and chromosome partitioning (D); post-translational modification, protein turnover, chaperones (O); cell envelope biogenesis, outer membrane (M); cell motility (N); inorganic ion transport and metabolism (P); signal transduction mechanisms (T); energy production and conversion (C); carbohydrate transport and metabolism (G); amino acid transport and metabolism (E); nucleotide transport and metabolism (F); coenzyme metabolism (H); lipid metabolism (I); secondary metabolites biosynthesis, transport, and catabolism (Q); general function prediction only (R); defense mechanisms (V); extracellular structures (W); intracellular trafficking, secretion, and vesicular transport (U); mobilome: prophages, transposons (X).

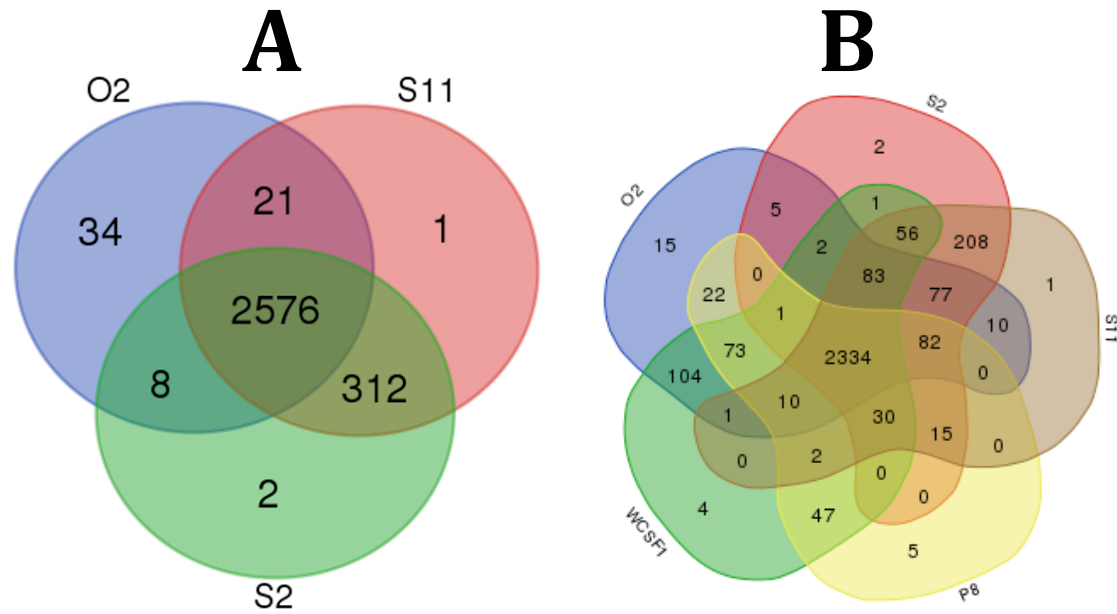

**Supplementary Figure 3.**

Venn diagram of OrthoMCL<sup>1</sup> analyses on S2T10D (S2), S11T3E (S11) and O2T60C (O2) proteomes (A) as well as on S2, S11, O2, P-8 and WCFS1 proteomes (B).

**Supplementary Table 1.** List of bacterial genomes used in this study and accession numbers.

| Genus                | Species             | Subspecies         | Strain           | Accession no.     |
|----------------------|---------------------|--------------------|------------------|-------------------|
| <i>Lactobacillus</i> | <i>plantarum</i>    |                    | WCFS1            | NC_004567.2       |
|                      |                     |                    | P-8              | NC_021224.2       |
|                      |                     |                    | JMD1             | NC_012984.1       |
|                      |                     |                    | ST-III           | NC_014554.1       |
|                      |                     |                    | ZJ316            | NC_020229.1       |
|                      |                     |                    | 16               | NC_021514.1       |
|                      |                     |                    | B21              | NZ_CP010528.1     |
|                      |                     |                    | C410L1           | NZ_CP017954.1     |
|                      |                     |                    | CAUH2            | NZ_CP015126.1     |
|                      |                     |                    | DF               | NZ_CP013753.1     |
|                      |                     |                    | DOMLa            | NZ_CP004406.1     |
|                      |                     |                    | HFC8             | NZ_CP012650.1     |
|                      |                     |                    | JBE245           | NZ_CP014780.1     |
|                      |                     |                    | KP               | NZ_CP013749.1     |
|                      |                     |                    | LY-78            | NZ_CP015308.1     |
|                      |                     |                    | LZ95             | NZ_CP012122.1     |
|                      |                     |                    | LZ206            | NZ_CP015966.1     |
|                      |                     |                    | LZ227            | NZ_CP015857.1     |
|                      |                     |                    | MF1298           | NZ_CP013149.1     |
|                      |                     |                    | NCU116           | NZ_CP016071.1     |
|                      | TS12                | NZ_CP018324.1      |                  |                   |
|                      | Zhang-LL            | NZ_CP011769.1      |                  |                   |
|                      | ZS058               | NZ_CP012343.1      |                  |                   |
|                      | 5-2                 | NZ_CP009236.1      |                  |                   |
|                      | RI-113              | NZ_CP017407.1      |                  |                   |
|                      | CLP0611             | NZ_CP019722.1      |                  |                   |
|                      | KLDS1.0391          | CP019348.1         |                  |                   |
|                      | <i>pentosus</i>     |                    | KCA1             | NZ_CM001538.1     |
|                      |                     |                    | MP-10            | NZ_FLYG00000000.1 |
|                      |                     |                    | FL0421           | NZ_LFLY00000000.1 |
|                      |                     |                    | DSM20314         | NZ_AZCU00000000.1 |
|                      | <i>fermentum</i>    |                    | IFO 3956         | NC_010610.1       |
|                      |                     |                    | CECT 5716        | NC_017465.1       |
|                      |                     |                    | F-6              | NC_021235.1       |
|                      | <i>helveticus</i>   |                    | DPC 4571         | NC_010080.1       |
|                      |                     |                    | H10              | NC_017467.1       |
|                      |                     |                    | R0052            | NC_018528.1       |
|                      | <i>paracasei</i>    |                    | ATCC 334         | NC_008526.1       |
|                      |                     |                    | 8700:2           | NC_022112.1       |
|                      |                     |                    | N1115            | NZ_CP007122.1     |
|                      | <i>reuteri</i>      |                    | DSM 20016        | NC_009513.1       |
|                      |                     |                    | JCM1112          | NC_010609.1       |
|                      |                     |                    | SD2112           | NC_015697.1       |
|                      | <i>rhamnosus</i>    |                    | GG               | NC_013198.1       |
| LC705                |                     |                    | NC_013199.1      |                   |
| ATCC 8530            |                     |                    | NC_017491.1      |                   |
| <i>brevis</i>        |                     | ATCC 367           | NC_008497.1      |                   |
|                      |                     | KB290              | NC_020819.1      |                   |
|                      |                     | NPS-QW-145         | NZ_CP015398.1    |                   |
| <i>salivarius</i>    |                     | UCC118             | NC_007929.1      |                   |
|                      |                     | CECT 5713          | NC_017481.1      |                   |
|                      |                     | JCM1046            | NZ_CP007646.1    |                   |
| <i>Streptococcus</i> | <i>dysgalactiae</i> | <i>equisimilis</i> | GGS_124          | NC_012891.1       |
|                      |                     |                    | ATCC 12394       | NC_017567.1       |
|                      |                     |                    | RE378            | NC_018712.1       |
|                      | <i>pneumoniae</i>   |                    | R6               | NC_003098.1       |
|                      |                     |                    | D39              | NC_008533.1       |
|                      |                     |                    | TIGR4            | NC_003028.3       |
| <i>mutans</i>        |                     | UA159              | NC_004350.2      |                   |
|                      |                     | NN2025             | NC_013928.1      |                   |
|                      |                     | LJ23               | NC_017768.1      |                   |
| <i>Lactococcus</i>   | <i>lactis</i>       | <i>cremoris</i>    | MG1363           | NC_009004.1       |
| <i>Bacillus</i>      | <i>subtilis</i>     | <i>subtilis</i>    | JH642 (str. 168) | NC_000964.3       |

**Supplementary Table 2.** Genes of O2T60C hosting nsSNPs which determine a gain of start and stop codons, or deletion of stop codons.

| COG categories                                                | Locus tag S2T10D                                |             | Encoded proteins                                                        | KO                                   | EC number                                   | Start lost | SNPs (nucleotide substitutions) |                  |
|---------------------------------------------------------------|-------------------------------------------------|-------------|-------------------------------------------------------------------------|--------------------------------------|---------------------------------------------|------------|---------------------------------|------------------|
|                                                               | S2T10D                                          | O2T60C      |                                                                         |                                      |                                             |            | Stop gained                     | Stop lost        |
| Carbohydrate transport and metabolism                         | BBF95_00309                                     | BBA85_01907 | Phosphonoacetaldehyde hydrolase                                         | K05306                               | 3.11.1.1                                    |            |                                 | 766 T>C          |
|                                                               | BBF95_00664                                     | BBA85_02394 | 6-phosphogluconate dehydrogenase (Decarboxylating)                      | K00033                               | 1.1.1.44 1.1.1.343                          |            |                                 | 623 A>G          |
|                                                               | BBF95_01103                                     | BBA85_02119 | Tkt2 protein                                                            |                                      |                                             |            | 1969 C>T                        |                  |
|                                                               | BBF95_01189                                     | BBA85_02782 | Alpha amylase, catalytic domain protein                                 | K01187                               | 3.2.1.20                                    |            | 390 G>A                         |                  |
|                                                               | BBF95_01468                                     | BBA85_03237 | Methionine transport protein                                            |                                      |                                             |            |                                 | 1484 G>T         |
|                                                               | BBF95_02021                                     | BBA85_02774 | Glycosyl hydrolase family 85                                            |                                      |                                             |            | 858 G>A                         |                  |
| Amino acid transport and metabolism                           | BBF95_01897                                     | BBA85_00550 | Methionine synthase                                                     |                                      |                                             |            | 561 C>A                         |                  |
|                                                               | BBF95_03033                                     | BBA85_02613 | Methionine synthase (Cobalamin-independent),C-terminal domain protein   |                                      |                                             |            |                                 | 219 A>G          |
| Lipid metabolism                                              | BBF95_02691                                     | BBA85_02973 | Lipase/esterase                                                         |                                      |                                             |            | 773 G>A                         |                  |
| Coenzyme metabolism                                           | BBF95_00838                                     | BBA85_00982 | Riboflavin biosynthesis protein RibBA                                   | K14652                               | 4.1.99.12 / 3.5.4.25                        |            |                                 | 817 T>C          |
|                                                               | BBF95_03047                                     | BBA85_02002 | GTP cyclohydrolase 1                                                    | K01495                               | 3.5.4.16                                    |            | 556 C>T                         |                  |
|                                                               | BBF95_03069                                     | BBA85_01544 | 2-dehydropanoate 2-reductase                                            | K00077                               | 1.1.1.169                                   |            |                                 | 879 A>C          |
| Inorganic ion transport and metabolism                        | BBF95_01532                                     | BBA85_03089 | ABC transporter, ATP-binding protein                                    | K01990                               |                                             |            | 28 C>T                          |                  |
|                                                               | BBF95_02412                                     | BBA85_02307 | Nitrate/sulfonate/bicarbonate ABC transporter ATP-binding protein       | K02049                               |                                             |            | 67 C>T                          |                  |
| Energy production and conversion                              | BBF95_01500                                     | BBA85_03055 | Isopentenyl-diphosphate delta-isomerase                                 | K01823                               | 5.3.3.2                                     |            |                                 | 928 T>A          |
|                                                               | BBF95_01581                                     | BBA85_03137 | Pyridine nucleotide-disulfide oxidoreductase                            | K00383                               | 1.8.1.7                                     |            | 625 G>T                         |                  |
| General function prediction only                              | BBF95_01756                                     | BBA85_02705 | Streptomycin 3'-adenylyltransferase                                     |                                      |                                             |            | 59 T>A                          |                  |
|                                                               | BBF95_02087                                     | BBA85_00214 | GNAT family acetyltransferase                                           |                                      |                                             |            |                                 | 187 T>C          |
| Secondary metabolites biosynthesis, transport, and catabolism | BBF95_03015                                     | BBA85_02595 | Dehydrosqualene desaturase                                              | K10027                               | 1.3.99.26 / 1.3.99.28 / 1.3.99.29 1.3.99.31 |            | 1145 C>A                        |                  |
| DNA replication, recombination, repair                        | BBF95_00026                                     | BBA85_01496 | DNA replication protein                                                 |                                      |                                             |            |                                 | 536 A>C          |
|                                                               | BBF95_02353                                     | BBA85_02253 | Putative 3-methyladenine DNA glycosylase                                | K03652                               | 3.2.2.21                                    |            | 243 G>A                         |                  |
| Defense mechanisms                                            | BBF95_00140                                     | BBA85_02925 | Immunity protein PlnL                                                   |                                      |                                             |            | 667 C>T                         |                  |
|                                                               | BBF95_00194                                     | BBA85_00864 | Beta-lactamase class A                                                  | K17836                               | 3.5.2.6                                     |            | 825 C>A                         |                  |
|                                                               | BBF95_01291                                     | BBA85_00075 | Multidrug ABC transporter, ATP-binding and permease protein             | K18891                               |                                             |            | 34 C>T                          |                  |
|                                                               | BBF95_01550                                     | BBA85_03106 | Chloramphenicol acetyltransferase                                       |                                      |                                             |            |                                 | 269 G>T          |
| Signal transduction mechanisms                                | BBF95_00250                                     | BBA85_02818 | Histidine kinase                                                        |                                      |                                             |            |                                 | 1039 T>C         |
|                                                               | BBF95_01475                                     | BBA85_03030 | Carotenoid biosynthetic protein CrkK                                    | K05770                               |                                             |            |                                 | 324 A>T          |
|                                                               | BBF95_02170                                     | BBA85_00313 | Cell filamentation protein Fic                                          |                                      |                                             |            |                                 | 169 T>C          |
| Transcription                                                 | BBF95_00030                                     | BBA85_01500 | Cro/Ci family transcriptional regulator                                 |                                      |                                             |            | 257 T>G                         |                  |
|                                                               | BBF95_00110                                     | BBA85_02894 | Transcription regulator, Rrf2 family                                    |                                      |                                             |            | 463 G>T                         |                  |
|                                                               | BBF95_00944                                     | BBA85_03003 | AraC family transcriptional regulator                                   |                                      |                                             |            |                                 | 850 T>C          |
|                                                               | BBF95_01129                                     | BBA85_01041 | Malolactate regulator, LysR family                                      |                                      |                                             |            |                                 | 744 A>C          |
|                                                               | BBF95_00127                                     | BBA85_02908 | Extracellular protein                                                   |                                      |                                             |            | 647 G>A                         |                  |
| Cell envelope biogenesis, outer membrane                      | BBF95_00698                                     | BBA85_00703 | Extracellular protein                                                   |                                      |                                             |            |                                 | 822 A>G          |
|                                                               | BBF95_01257                                     | BBA85_00051 | Cell surface protein                                                    |                                      |                                             |            | 739 C>T                         |                  |
|                                                               | BBF95_01305                                     | /           | Adherence-associated mucus-binding protein,LPXTG-motif cell wall anchor |                                      |                                             |            | 1108 C>T                        |                  |
|                                                               | BBF95_01306                                     | BBA85_02426 | Cell surface protein                                                    |                                      |                                             |            |                                 | 2635 T>G         |
|                                                               | BBF95_01386                                     | BBA85_02992 | Predicted membrane protein                                              |                                      |                                             |            | 508 C>T                         |                  |
|                                                               | BBF95_01574                                     | BBA85_03130 | Putative membrane protein                                               |                                      |                                             |            | 1311 C>A                        |                  |
|                                                               | BBF95_01640                                     | BBA85_01579 | Lpxtg-motif cell wall anchor domain protein                             |                                      |                                             |            |                                 | 1408 T>C         |
|                                                               | BBF95_02026                                     | BBA85_03238 | Cell surface SD repeat protein,membrane-anchored                        |                                      |                                             | 2 T>C      |                                 |                  |
|                                                               | BBF95_02171                                     | BBA85_00313 | Cell division protein Fic                                               |                                      |                                             |            |                                 | 160 T>C          |
|                                                               | BBF95_02506                                     | BBA85_01286 | Cell surface protein, LPXTG-motif cell wall anchor                      |                                      |                                             |            |                                 | 2419 T>C         |
|                                                               | BBF95_02660                                     | BBA85_00522 | Putative membrane protein                                               |                                      |                                             |            |                                 | 539 A>G; 538 T>C |
|                                                               | Mobilome: prophages, transposons, plasmid genes | BBF95_00066 | /                                                                       | Plasmid pLP-ZJ103, complete sequence |                                             |            |                                 | 4 G>T            |
| BBF95_01378                                                   |                                                 | BBA85_00404 | Prophage tail length tape-measure protein                               |                                      |                                             |            | 3830 C>G                        |                  |
| BBF95_01381                                                   |                                                 | BBA85_00408 | Phage tail protein                                                      |                                      |                                             | 1 A>G      |                                 |                  |
| BBF95_01382                                                   |                                                 | BBA85_00409 | Prophage protein, DUF646 family                                         |                                      |                                             |            | 350 C>G                         |                  |
| BBF95_01684                                                   |                                                 | BBA85_00017 | Prophage P2a protein 53                                                 |                                      |                                             |            |                                 | 790 T>G          |
| BBF95_02031                                                   |                                                 | BBA85_00940 | Transposase IS30 (Fragment)                                             |                                      |                                             | 2 T>C      |                                 | 408 A>T          |
| Function unknown / Not assigned                               | BBF95_02748                                     | BBA85_02421 | Transposase (Fragment)                                                  |                                      |                                             |            |                                 |                  |
|                                                               | BBF95_01316                                     | BBA85_02438 | Hypothetical cytosolic protein                                          |                                      |                                             |            | 421 C>T                         |                  |
|                                                               | BBF95_00177                                     | BBA85_02952 | Putative uncharacterized protein                                        |                                      |                                             |            |                                 | 215 A>G          |
|                                                               | BBF95_00252                                     | BBA85_02820 | Putative uncharacterized protein                                        |                                      |                                             |            | 283 C>T                         |                  |
|                                                               | BBF95_00772                                     | /           | Putative uncharacterized protein                                        |                                      |                                             |            | 126 G>A                         |                  |
|                                                               | BBF95_00885                                     | BBA85_00160 | Putative uncharacterized protein                                        |                                      |                                             |            | 82 C>T                          |                  |
|                                                               | BBF95_01460                                     | /           | Putative uncharacterized protein                                        |                                      |                                             |            | 197 G>A                         |                  |
|                                                               | BBF95_01673                                     | BBA85_01098 | Addiction module toxin, PemK-like protein                               |                                      |                                             |            |                                 | 388 T>G          |
|                                                               | BBF95_01776                                     | BBA85_02722 | DNA-binding protein with HIRAN domain                                   |                                      |                                             |            |                                 | 231 A>G          |
|                                                               | BBF95_02280                                     | /           | Putative uncharacterized protein                                        |                                      |                                             |            | 16 C>T                          |                  |
|                                                               | BBF95_02605                                     | /           | Putative uncharacterized protein                                        |                                      |                                             | 3 G>A      | 91 C>T                          |                  |
|                                                               | BBF95_02627                                     | BBA85_01538 | Diguanylate cyclase/phosphodiesterase, GGDEF domain protein             |                                      |                                             |            |                                 | 670 T>C          |
|                                                               | BBF95_02760                                     | BBA85_01925 | ATP-dependent DNA helicase/translocase (Putative)                       |                                      |                                             |            |                                 | 103 T>G          |

Supplementary Table 3. Genes exclusively hosted in the genotype O2T60C

| GIS         | Locus tags  | Genes                                           | Encoded proteins                                                                   | KO               | EC number          |
|-------------|-------------|-------------------------------------------------|------------------------------------------------------------------------------------|------------------|--------------------|
| GI 1        | BBA85_00118 |                                                 | FecB protein                                                                       | K02016           |                    |
|             | BBA85_00119 |                                                 | Iron chelating ABC transporter, ATP-binding protein                                | K02013           | 3.6.3.34           |
|             | BBA85_00120 |                                                 | Iron chelating ABC transporter, permease protein                                   | K02015           |                    |
|             | BBA85_00121 | <i>ykuN</i>                                     | Flavodoxin                                                                         |                  |                    |
|             | BBA85_00122 | <i>moaE</i>                                     | Molybdopterin biosynthesis protein, E chain                                        | K03635           | 2.8.1.12           |
|             | BBA85_00123 |                                                 | Molybdopterin converting factor, small subunit                                     | K03636           |                    |
|             | BBA85_00124 | <i>moaA</i>                                     | Cyclic pyranopterin monophosphate synthase                                         | K03639           | 4.1.99.22          |
|             | BBA85_00125 | <i>narK</i>                                     | Nitrite extrusion protein                                                          | K02575           |                    |
|             | BBA85_00126 |                                                 | N-6 adenine-specific DNA methylase YitW                                            |                  |                    |
|             | BBA85_00127 |                                                 | XRE family transcriptional regulator                                               |                  |                    |
|             | BBA85_00128 |                                                 | Putative uncharacterized protein                                                   |                  |                    |
|             | BBA85_00129 |                                                 | Putative uncharacterized protein                                                   |                  |                    |
|             | BBA85_00130 |                                                 | Putative uncharacterized protein                                                   |                  |                    |
|             | BBA85_00131 | <i>nreC</i>                                     | Two component transcriptional regulator, LuxR family                               | K07696           |                    |
|             | BBA85_00132 | <i>nreB</i>                                     | Sensor histidine kinase                                                            | K07683           | 2.7.13.3           |
|             | BBA85_00133 |                                                 | NreA                                                                               | K10851           |                    |
|             | BBA85_00134 |                                                 | Putative uncharacterized protein                                                   |                  |                    |
|             | BBA85_00135 | <i>mobA</i>                                     | Molybdopterin-guanine dinucleotide biosynthesis protein MobA (Putative)            | K03752           |                    |
|             | BBA85_00136 | <i>moaC</i>                                     | Cyclic pyranopterin monophosphate synthase accessory protein                       | K03637           | 4.6.1.17           |
|             | BBA85_00137 | <i>mobB</i>                                     | MobB protein                                                                       | K03753           |                    |
|             | BBA85_00138 | <i>moaE</i>                                     | Molybdopterin biosynthesis protein MoeA                                            | K03750           | 2.10.1.1           |
|             | BBA85_00139 | <i>moaB</i>                                     | Molybdenum cofactor biosynthesis protein B                                         | K03638           |                    |
|             | BBA85_00140 | <i>thiF</i>                                     | MoeB protein                                                                       | K21029           | 2.7.7.80           |
|             | BBA85_00141 | <i>narG</i>                                     | Nitrate reductase, alpha chain                                                     | K00370           | 1.7.5.1 1.7.99.4   |
| BBA85_00142 | <i>narH</i> | Nitrate reductase, beta chain                   | K00371                                                                             | 1.7.5.1 1.7.99.4 |                    |
| BBA85_00143 | <i>narJ</i> | Nitrate reductase, delta chain                  | K00373                                                                             |                  |                    |
| BBA85_00144 | <i>narI</i> | Nitrate reductase, gamma chain                  | K00374                                                                             | 1.7.5.1 1.7.99.4 |                    |
| BBA85_00148 |             | Cro/Ci transcriptional regulator                | K07727                                                                             |                  |                    |
| GI 2        | BBA85_01811 | <i>rihA</i>                                     | Inosine-uridine nucleoside N-ribohydrolase                                         | K01250           |                    |
|             | BBA85_01812 |                                                 | Oxidoreductase, medium chain dehydrogenase/reductase family (MDR)                  |                  |                    |
|             | BBA85_01813 |                                                 | UPF0303 protein CMPG5300_2915                                                      |                  |                    |
|             | BBA85_01814 | <i>yrbE</i>                                     | Myo-inositol 2-dehydrogenase-like (Promiscuous)                                    | K00010           | 1.1.1.18 1.1.1.369 |
|             | BBA85_01815 | <i>iolT</i>                                     | Myo-inositol (And similar sugars) transporter, major facilitator superfamily (MFS) |                  |                    |
|             | BBA85_01816 | <i>yrbE</i>                                     | Myo-inositol 2-dehydrogenase-like (Promiscuous)                                    | K00010           | 1.1.1.18 1.1.1.369 |
|             | BBA85_01817 | <i>iolE</i>                                     | Inosose dehydratase                                                                | K03335           | 4.2.1.44           |
|             | BBA85_01818 | <i>iolG</i>                                     | Inositol 2-dehydrogenase/D-chiro-inositol 3-dehydrogenase                          | K00010           | 1.1.1.18 1.1.1.369 |
|             | BBA85_01819 | <i>iolX</i>                                     | Myo-inositol 2-dehydrogenase-like (Promiscuous)                                    | K00010           | 1.1.1.18 1.1.1.369 |
|             | BBA85_01821 |                                                 | Sugar-phosphate aldolase                                                           | K01628           | 4.1.2.17           |
|             | BBA85_01822 |                                                 | Putative uncharacterized protein                                                   |                  |                    |
|             | BBA85_01823 | <i>gatC</i>                                     | Pts36C protein                                                                     | K02775           |                    |
|             | BBA85_01824 |                                                 | Galactitol PTS, EIIB                                                               |                  |                    |
|             | BBA85_01825 |                                                 | Galactitol PTS, EIIA                                                               | K02773           | 2.7.1.200          |
|             | BBA85_01826 | <i>iolR</i>                                     | Transcription regulator, DeoR family                                               |                  |                    |
|             | BBA85_01827 |                                                 | Plasmid pLP-ZJ103, complete sequence                                               |                  |                    |
| GI 3        | BBA85_00355 | <i>cmtB</i>                                     | PTS family L-ascorbate (L-asc) porter component IIA                                |                  |                    |
|             | BBA85_00356 | <i>ppaX</i>                                     | Gph3 protein                                                                       |                  |                    |
|             | BBA85_00357 |                                                 | L-iditol 2-dehydrogenase                                                           | K00008           | 1.1.1.14           |
|             | BBA85_00358 | <i>gatC</i>                                     | Galactitol PTS, EIIC                                                               | K02775           |                    |
|             | BBA85_00359 | <i>gatB</i>                                     | Putative N(Pi)-phosphohistidine--sugar phosphotransferase                          | K02774           | 2.7.1.200          |
|             | BBA85_00360 | <i>gatA</i>                                     | Phosphoenolpyruvate-dependent sugar phosphotransferase system, EIIA 2              | K02773           | 2.7.1.200          |
|             | BBA85_00361 | <i>glpR</i>                                     | DeoR family transcriptional regulator                                              | K02444           |                    |
|             | BBA85_00362 | <i>lp_3551</i>                                  | Probable phosphoketolase                                                           |                  |                    |
|             | BBA85_00363 |                                                 | Transcription regulator                                                            |                  |                    |
|             | BBA85_00364 |                                                 | Putative uncharacterized protein                                                   |                  |                    |
| BBA85_00365 |             | Lipase/esterase                                 |                                                                                    |                  |                    |
| BBA85_00366 | <i>xynB</i> | Lipase/esterase (Putative)                      |                                                                                    |                  |                    |
| BBA85_00367 | <i>sgIT</i> | Sodium-coupled N-acetylneuraminase transporter  | K03307                                                                             |                  |                    |
| GI 4        | BBA85_00391 |                                                 | Putative uncharacterized protein                                                   |                  |                    |
|             | BBA85_00392 |                                                 | Sugar specific permease (Putative)                                                 |                  |                    |
|             | BBA85_00393 | <i>rhaD</i>                                     | Rhamnulose-1-phosphate aldolase                                                    | K01629           | 4.1.2.19           |
|             | BBA85_00394 | <i>rhaA</i>                                     | L-rhamnose isomerase                                                               | K01813           | 5.3.1.14           |
|             | BBA85_00395 | <i>rhaM</i>                                     | L-rhamnose mutarotase                                                              | K03534           |                    |
|             | BBA85_00396 | <i>rhaB</i>                                     | Rhamnulokinase                                                                     | K00848           | 2.7.1.5            |
|             | BBA85_00397 | <i>iolF</i>                                     | Sugar transport protein                                                            | K06610           |                    |
|             | BBA85_00398 |                                                 | Transcription regulator                                                            |                  |                    |
|             | BBA85_00399 | <i>ydjF</i>                                     | Transcription regulator, DeoR family                                               |                  |                    |
| GI 5        | BBA85_02470 | <i>fhuB</i>                                     | Ferrichrome ABC transporter, permease protein                                      | K02015           |                    |
|             | BBA85_02471 | <i>fhuG</i>                                     | FhuG protein                                                                       |                  |                    |
|             | BBA85_02472 | <i>feuC</i>                                     | Iron ABC transporter permease                                                      | K02015           |                    |
| BBA85_00348 | <i>lytS</i> | Two-component system, sensor histidine kinase   | K07718                                                                             | 2.7.13.3         |                    |
| BBA85_00371 | <i>nanA</i> | N-acetylneuraminase lyase                       | K01639                                                                             | 4.1.3.3          |                    |
| BBA85_00444 |             | RepB protein                                    |                                                                                    |                  |                    |
| BBA85_00445 |             | RepA protein                                    |                                                                                    |                  |                    |
| BBA85_00448 |             | RepB protein                                    |                                                                                    |                  |                    |
| BBA85_00449 |             | RepA protein                                    |                                                                                    |                  |                    |
| BBA85_00462 |             | Putative mucus binding protein                  |                                                                                    |                  |                    |
| BBA85_00858 |             | Putative mucus binding protein                  |                                                                                    |                  |                    |
| BBA85_00922 | <i>mobA</i> | Mobilization protein MobA                       |                                                                                    |                  |                    |
| BBA85_00925 |             | Replication protein RepB                        |                                                                                    |                  |                    |
| BBA85_00928 | <i>chpB</i> | MazF family toxin-antitoxin system              |                                                                                    |                  |                    |
| BBA85_00933 |             | Mobilization protein MobA                       |                                                                                    |                  |                    |
| BBA85_00942 | <i>bin3</i> | DNA integration/recombination/inversion protein |                                                                                    |                  |                    |
| BBA85_00954 |             | Putative mucus binding protein                  |                                                                                    |                  |                    |
| BBA85_01088 |             | Putative resolvase                              |                                                                                    |                  |                    |
| BBA85_01712 | <i>mtlA</i> | Pts2CB protein                                  | K02799                                                                             | 2.7.1.197        |                    |
| BBA85_01729 |             | Putative uncharacterized protein (Fragment)     |                                                                                    |                  |                    |
| BBA85_01774 |             | 50S ribosomal protein L34                       | K02914                                                                             |                  |                    |

|             |             |                                                               |        |          |
|-------------|-------------|---------------------------------------------------------------|--------|----------|
| BBA85_02211 | <i>desR</i> | Rrp6 protein                                                  | K07693 |          |
| BBA85_02212 | <i>yvfT</i> | Two-component system histidine protein kinase, sensor protein | K07778 | 2.7.13.3 |
| BBA85_02216 | <i>guaA</i> | Acetyltransferase (Putative)                                  | K03827 |          |
| BBA85_02219 |             | Draft genome                                                  |        |          |
| BBA85_02320 |             | Rep                                                           |        |          |
| BBA85_02487 | <i>nudC</i> | Pyrophosphatase (Putative)                                    | K03426 | 3.6.1.22 |
| BBA85_02765 | <i>glgE</i> | Alpha-amylase                                                 | K01176 | 3.2.1.1  |
| BBA85_02808 |             | CDP-glycerol:poly(Glycerophosphate) glycerophosphotransferase | K09809 |          |
| BBA85_02809 |             | CDP-glycerol:poly(Glycerophosphate) glycerophosphotransferase |        |          |
| BBA85_03166 |             | Putative uncharacterized protein (Fragment)                   |        |          |
| BBA85_03189 |             | Type II restriction enzyme, methylase subunit                 |        |          |
| BBA85_03191 |             | Type II restriction enzyme, methylase subunit                 |        |          |

Mobilome: prophages, transposons, plasmid genes

|             |  |                                                           |  |  |
|-------------|--|-----------------------------------------------------------|--|--|
| BBA85_00405 |  | Prophage protein                                          |  |  |
| BBA85_00599 |  | Prophage protein                                          |  |  |
| BBA85_00601 |  | Prophage Lp2 protein 36                                   |  |  |
| BBA85_00604 |  | Prophage protein                                          |  |  |
| BBA85_00624 |  | Cro/C1 family phage transcriptional regulator             |  |  |
| BBA85_00859 |  | Transposase                                               |  |  |
| BBA85_00936 |  | Transposase-like protein                                  |  |  |
| BBA85_00943 |  | Plasmid pLP-ZJ103, complete sequence                      |  |  |
| BBA85_00948 |  | Transposase                                               |  |  |
| BBA85_00949 |  | Transposase, IS4 family                                   |  |  |
| BBA85_01074 |  | Transposase                                               |  |  |
| BBA85_01083 |  | Plasmid pLP-ZJ103, complete sequence                      |  |  |
| BBA85_01084 |  | Transposase                                               |  |  |
| BBA85_01108 |  | Prophage Lp2 protein 26                                   |  |  |
| BBA85_01110 |  | Prophage protein                                          |  |  |
| BBA85_01116 |  | Prophage protein                                          |  |  |
| BBA85_01287 |  | Transposase                                               |  |  |
| BBA85_01430 |  | Toxin-antitoxin system, toxin component, PemK/MazF family |  |  |
| BBA85_01473 |  | Prophage protein, immunity repressor                      |  |  |
| BBA85_01476 |  | Prophage Lp2 protein 6                                    |  |  |
| BBA85_01730 |  | Transposase                                               |  |  |
| BBA85_01731 |  | Transposase                                               |  |  |
| BBA85_01827 |  | Plasmid pLP-ZJ103, complete sequence                      |  |  |
| BBA85_01828 |  | Transposase                                               |  |  |
| BBA85_01952 |  | Plasmid pLP-ZJ103, complete sequence                      |  |  |
| BBA85_01953 |  | Transposase                                               |  |  |
| BBA85_01975 |  | Plasmid LBp5, complete sequence                           |  |  |
| BBA85_02354 |  | Transposase                                               |  |  |
| BBA85_02371 |  | Transposase                                               |  |  |
| BBA85_02372 |  | Transposase, IS4 family                                   |  |  |
| BBA85_02805 |  | Transposase                                               |  |  |
| BBA85_02811 |  | Transposase                                               |  |  |
| BBA85_02964 |  | Transposase                                               |  |  |
| BBA85_02965 |  | Plasmid pLP-ZJ103, complete sequence                      |  |  |
| BBA85_03157 |  | Transposase                                               |  |  |
| BBA85_03158 |  | Transposase (Fragment)                                    |  |  |
| BBA85_03212 |  | Putative transposase (Putative)                           |  |  |



Supplementary Table 4. Genes exclusively hosted in the genotype S2T100/S11T3E

| Locus tags  |             | Encoded proteins                                                                                 | KO                                                                        | EC number       |
|-------------|-------------|--------------------------------------------------------------------------------------------------|---------------------------------------------------------------------------|-----------------|
| GIS         | S2T100      | S11T3E                                                                                           |                                                                           |                 |
| G6          | BBF95_00141 | BBAA4_02481                                                                                      | Plantaricin biosynthesis protein PlnQ                                     |                 |
|             | BBF95_00142 | BBAA4_02482                                                                                      | Three-component system histidine protein kinase PlnB, sensor protein      | K07706 2.7.13.3 |
|             | BBF95_00143 | BBAA4_02483                                                                                      | Three-component response regulator PlnC, activator                        | K07707          |
|             | BBF95_00144 | BBAA4_02484                                                                                      | Three-component response regulator PlnD, repressor                        | K07707          |
|             | BBF95_00145 | BBAA4_02485                                                                                      | Bacteriocin immunity protein PlnI, membrane-bound protease CAAX family    |                 |
|             | BBF95_00146 | BBAA4_02486                                                                                      | Bacteriocin peptide PlnF                                                  |                 |
|             | BBF95_00147 | BBAA4_02487                                                                                      | Bacteriocin peptide PlnE (Putative)                                       |                 |
|             | BBF95_00148 | BBAA4_02488                                                                                      | Bacteriocin ABC transporter, ATP-binding and permease protein PlnG        |                 |
|             | BBF95_00150 | BBAA4_02489                                                                                      | Bacteriocin ABC transporter, ATP-binding and permease protein PlnH        | K20344          |
|             | BBF95_00151 | BBAA4_02490                                                                                      | Putative putative accessory factor for ABC-transporter (plnH)             |                 |
| G7          | BBF95_00152 | BBAA4_02491                                                                                      | Bacteriocin ABC transporter, accessory factor PlnI                        | K20345          |
|             | BBF95_02519 | BBAA4_01067                                                                                      | Type I restriction-modification system, restriction subunit               | K01153          |
|             | BBF95_02520 | BBAA4_01068                                                                                      | Type I restriction-modification system, specificity subunit               | K03427          |
| G8          | BBF95_02521 | BBAA4_01069                                                                                      | Restriction-modification system specificity subunit                       |                 |
|             | BBF95_02522 | BBAA4_01070                                                                                      | Type I restriction modification DNA specificity domain protein (Fragment) |                 |
|             | BBF95_02523 | BBAA4_01071                                                                                      | Type I restriction modification DNA specificity domain protein            |                 |
| G9          | BBF95_00632 | BBAA4_00359                                                                                      | Glycosyltransferase, group 2 family protein                               | K07011          |
|             | BBF95_00633 | BBAA4_00360                                                                                      | Glycosyl transferase family 2                                             | K07011          |
|             | BBF95_00634 | BBAA4_00361                                                                                      | UDP-galactopyranose mutase                                                | K01854          |
|             | BBF95_00635 | BBAA4_00362                                                                                      | Polysaccharide biosynthesis protein                                       |                 |
|             | BBF95_00636 | BBAA4_00363                                                                                      | Cps3C protein                                                             |                 |
|             | BBF95_00637 | BBAA4_00364                                                                                      | Polysaccharide biosynthesis membrane protein                              |                 |
|             | BBF95_00638 | BBAA4_00365                                                                                      | Polysaccharide biosynthesis protein                                       |                 |
|             | BBF95_01179 | BBAA4_00353                                                                                      | UDP-galactopyranose mutase                                                | K01854          |
|             | BBF95_01181 | BBAA4_00355                                                                                      | Polysaccharide biosynthesis protein                                       |                 |
|             | BBF95_01182 | BBAA4_00356                                                                                      | Capsule chain length determinant protein                                  |                 |
| G10         | BBF95_01183 | BBAA4_00357                                                                                      | Polysaccharide biosynthesis protein                                       |                 |
|             | BBF95_01848 | BBAA4_00121                                                                                      | Uncharacterized membrane protein ybbJ                                     |                 |
|             | BBF95_01847 | BBAA4_00132                                                                                      | Putative membrane protein                                                 |                 |
|             | BBF95_01846 | BBAA4_00133                                                                                      | Lipoprotein                                                               |                 |
|             | BBF95_02607 | BBAA4_00608                                                                                      | Putative glycosyltransferase TIGR03111                                    |                 |
|             | BBF95_02608 | BBAA4_00609                                                                                      | ta2 protein                                                               |                 |
|             | BBF95_02609 | BBAA4_00610                                                                                      | Integral membrane protein                                                 |                 |
|             | BBF95_01659 | BBAA4_00167                                                                                      | Transcription regulator                                                   |                 |
|             | BBF95_01655 | BBAA4_00168                                                                                      | Formate C-acetyltransferase                                               | K00656 2.3.1.54 |
|             | BBF95_00138 | BBAA4_02478                                                                                      | Putative bacteriocin                                                      |                 |
| G11         | BBF95_00333 | BBAA4_00782                                                                                      | Methionine synthase (Cobalamin-independent), C-terminal domain protein    |                 |
|             | BBF95_00084 | BBAA4_01090                                                                                      | Lactococcin A immunity protein                                            |                 |
|             | BBF95_00345 | BBAA4_01719                                                                                      | Oligopeptide ABC transporter substrate binding protein                    |                 |
|             | BBF95_02428 | BBAA4_02313                                                                                      | Putative tlcC                                                             |                 |
|             | BBF95_01404 | BBAA4_02574                                                                                      | Peptidase E                                                               |                 |
|             | BBF95_03092 | BBAA4_02701                                                                                      | Putative pyruvate oxidase                                                 |                 |
|             | BBF95_00663 | BBAA4_00389                                                                                      | 6-phosphogluconate dehydrogenase, decarboxylating                         |                 |
|             | BBF95_02255 | BBAA4_01204                                                                                      | Glucose-1-P adenyltransferase, regulatory subunit                         |                 |
|             | BBF95_02167 | BBAA4_01389                                                                                      | Sugar transport protein                                                   |                 |
|             | BBF95_02708 | BBAA4_01410                                                                                      | ABC transporter permease                                                  |                 |
| BBF95_02709 | BBAA4_01411 | Carbohydrate ABC transporter membrane protein 1, CUT1 family                                     |                                                                           |                 |
| BBF95_02710 | BBAA4_01412 | Sugar ABC transporter substrate-binding protein                                                  |                                                                           |                 |
| BBF95_02711 | BBAA4_01413 | Glycosyl hydrolase family 65 central catalytic domain protein                                    |                                                                           |                 |
| BBF95_02718 | BBAA4_01420 | Transport protein, MFS family                                                                    |                                                                           |                 |
| BBF95_02721 | BBAA4_01423 | Bifunctional protein                                                                             |                                                                           |                 |
| BBF95_01651 | BBAA4_01475 | Sugar transport protein                                                                          |                                                                           |                 |
| BBF95_03086 | BBAA4_01476 | Phosphoenolpyruvate-dependent sugar phosphotransferase system EIIBC                              | K02757 3.2.1.86                                                           |                 |
| BBF95_03087 | BBAA4_01499 | 6-phospho-beta-glucosidase                                                                       | K01223 3.2.1.86                                                           |                 |
| BBF95_00072 | BBAA4_01885 | Arabinose efflux permease                                                                        |                                                                           |                 |
| BBF95_02739 | BBAA4_02302 | Drug resistance transporter, MFS superfamily, EmrB/QacA family                                   |                                                                           |                 |
| BBF95_02058 | BBAA4_02311 | Drug resistance transporter, EmrB/QacA subfamily                                                 |                                                                           |                 |
| BBF95_00220 | BBAA4_02344 | Permease IIC component                                                                           | K02761 2.7.1.45                                                           |                 |
| BBF95_00226 | BBAA4_02350 | KdGK protein                                                                                     | K00874 2.7.1.45                                                           |                 |
| BBF95_00247 | BBAA4_02371 | Transport protein, major facilitator superfamily (MFS)                                           |                                                                           |                 |
| BBF95_02045 | BBAA4_02713 | Glucose-1-phosphate adenyltransferase, subunit                                                   |                                                                           |                 |
| BBF95_00073 | BBAA4_01886 | Polysaccharide pyruvyl transferase                                                               |                                                                           |                 |
| BBF95_01408 | BBAA4_02698 | Beta-phosphoglucomutase                                                                          |                                                                           |                 |
| BBF95_01660 | BBAA4_00166 | Transaldolase                                                                                    |                                                                           |                 |
| BBF95_02572 | BBAA4_00574 | Glycosyltransferase, family 1 (GT1)                                                              |                                                                           |                 |
| BBF95_00070 | BBAA4_01081 | Glycosyltransferase                                                                              |                                                                           |                 |
| BBF95_02128 | BBAA4_01350 | Extracellular protein, gamma-D-glutamate-meso-diaminopimelate muropeptidase                      |                                                                           |                 |
| BBF95_00318 | BBAA4_01902 | UDP-galactopyranose mutase                                                                       |                                                                           |                 |
| BBF95_02275 | BBAA4_01224 | ATPase, AAA family                                                                               |                                                                           |                 |
| BBF95_02786 | BBAA4_01575 | Glycosyltransferase, group 2 family protein                                                      |                                                                           |                 |
| BBF95_02440 | BBAA4_02325 | Copy number control protein                                                                      |                                                                           |                 |
| BBF95_02740 | BBAA4_02301 | Ferrochelatase                                                                                   |                                                                           |                 |
| BBF95_02542 | BBAA4_02086 | Methyltransferase family protein                                                                 |                                                                           |                 |
| BBF95_00319 | BBAA4_01911 | Riboflavin biosynthesis protein RibBA                                                            |                                                                           |                 |
| BBF95_00346 | BBAA4_01720 | Proline iminopeptidase                                                                           |                                                                           |                 |
| BBF95_00347 | BBAA4_01721 | Proline iminopeptidase                                                                           |                                                                           |                 |
| BBF95_01407 | BBAA4_02697 | CoI-like hydrolase                                                                               |                                                                           |                 |
| BBF95_00555 | BBAA4_00382 | Extracellular protein, beta-lactamase family                                                     |                                                                           |                 |
| BBF95_00556 | BBAA4_00383 | Serine-type D-Ala-D-Ala carboxypeptidase                                                         |                                                                           |                 |
| BBF95_01550 | BBAA4_01955 | Chloramphenicol acetyltransferase                                                                |                                                                           |                 |
| BBF95_01609 | BBAA4_02013 | Mir restriction system protein                                                                   | K07448                                                                    |                 |
| BBF95_02741 | BBAA4_02300 | Antimicrobial peptide ABC transporter, ATPase component                                          |                                                                           |                 |
| BBF95_02938 | BBAA4_00827 | ICEBs1 integrase                                                                                 |                                                                           |                 |
| BBF95_02503 | BBAA4_01051 | Superfamily I DNA/RNA helicase                                                                   |                                                                           |                 |
| BBF95_02504 | BBAA4_01052 | Superfamily I DNA/RNA helicase                                                                   |                                                                           |                 |
| BBF95_02042 | BBAA4_01484 | RegI protein                                                                                     |                                                                           |                 |
| BBF95_02760 | BBAA4_01548 | ATP-dependent DNA helicase/translocase (Putative)                                                |                                                                           |                 |
| BBF95_00079 | BBAA4_01892 | DNA polymerase III subunit epsilon                                                               |                                                                           |                 |
| BBF95_02358 | BBAA4_02126 | Integrase                                                                                        |                                                                           |                 |
| BBF95_02032 | BBAA4_02292 | Site-specific recombinase, DNA invertase Pin-related protein                                     |                                                                           |                 |
| BBF95_02736 | BBAA4_02305 | ImpB/MucD/SanB family protein (Fragment)                                                         |                                                                           |                 |
| BBF95_00079 | BBAA4_02324 | DNA polymerase III subunit epsilon                                                               |                                                                           |                 |
| BBF95_01658 | BBAA4_01480 | Formate C-acetyltransferase                                                                      |                                                                           |                 |
| BBF95_02423 | BBAA4_02287 | Membrane protein, Ynf family                                                                     |                                                                           |                 |
| BBF95_02738 | BBAA4_02303 | Heme peroxidase HemQ, essential component of heme biosynthetic pathway in Gram-positive bacteria | K03100 3.4.21.89                                                          |                 |
| BBF95_02645 | BBAA4_00883 | Signal peptidase I                                                                               |                                                                           |                 |
| BBF95_00643 | BBAA4_00370 | Cell wall surface anchor family protein                                                          |                                                                           |                 |
| BBF95_00966 | BBAA4_00487 | Integral membrane protein                                                                        |                                                                           |                 |
| BBF95_00741 | BBAA4_00507 | Integral membrane protein                                                                        |                                                                           |                 |
| BBF95_00677 | BBAA4_00611 | Extracellular protein                                                                            |                                                                           |                 |
| BBF95_00697 | BBAA4_00631 | Cell surface protein, CscB family                                                                |                                                                           |                 |
| BBF95_02968 | BBAA4_00718 | Putative membrane protein                                                                        |                                                                           |                 |
| BBF95_03041 | BBAA4_00790 | Putative membrane protein                                                                        |                                                                           |                 |
| BBF95_00069 | BBAA4_01082 | Integral membrane protein                                                                        |                                                                           |                 |
| BBF95_02713 | BBAA4_01415 | Membrane protein                                                                                 |                                                                           |                 |
| BBF95_01325 | BBAA4_01461 | Cell surface protein                                                                             |                                                                           |                 |
| BBF95_02747 | BBAA4_01487 | Integral membrane protein                                                                        |                                                                           |                 |
| BBF95_00046 | BBAA4_01502 | Membrane protein                                                                                 |                                                                           |                 |
| BBF95_00047 | BBAA4_01503 | Membrane protein                                                                                 |                                                                           |                 |
| BBF95_02783 | BBAA4_01572 | Putative uncharacterized protein                                                                 |                                                                           |                 |
| BBF95_02784 | BBAA4_01573 | Putative membrane protein                                                                        |                                                                           |                 |
| BBF95_02613 | BBAA4_01870 | Cell surface protein, LPXTG-motif cell wall anchor                                               |                                                                           |                 |
| BBF95_00075 | BBAA4_01888 | Membrane protein                                                                                 |                                                                           |                 |
| BBF95_01545 | BBAA4_01950 | Membrane protein                                                                                 |                                                                           |                 |
| BBF95_02356 | BBAA4_02124 | Lipoprotein                                                                                      |                                                                           |                 |
| BBF95_00046 | BBAA4_02183 | Membrane protein                                                                                 |                                                                           |                 |
| BBF95_00047 | BBAA4_02184 | Membrane protein                                                                                 |                                                                           |                 |
| BBF95_02029 | BBAA4_02295 | Putative membrane protein                                                                        |                                                                           |                 |
| BBF95_02742 | BBAA4_02299 | Sensory box protein                                                                              |                                                                           |                 |
| BBF95_00005 | BBAA4_02328 | Membrane protein                                                                                 |                                                                           |                 |
| BBF95_00125 | BBAA4_02465 | Extracellular protein, lysine-rich                                                               |                                                                           |                 |
| BBF95_00126 | BBAA4_02466 | LmoD14C protein                                                                                  |                                                                           |                 |
| BBF95_00127 | BBAA4_02467 | Extracellular protein                                                                            |                                                                           |                 |
| BBF95_01402 | BBAA4_02572 | Membrane protein                                                                                 |                                                                           |                 |
| BBF95_02538 | BBAA4_02682 | Membrane protein                                                                                 |                                                                           |                 |
| BBF95_00831 | BBAA4_02903 | Lactobacilli aggregation promoting factor                                                        |                                                                           |                 |
| BBF95_01782 | BBAA4_01884 | Purine nucleoside phosphorylase                                                                  |                                                                           |                 |
| BBF95_01653 | BBAA4_01477 | Formate acetyltransferase activating enzyme                                                      | K04069                                                                    |                 |
| BBF95_01716 | BBAA4_01738 | Peptidase, S8/S53 family                                                                         |                                                                           |                 |
| BBF95_02535 | BBAA4_02679 | Glutathione S-transferase                                                                        |                                                                           |                 |
| BBF95_02618 | BBAA4_01865 | Cytochrome P-450                                                                                 |                                                                           |                 |
| BBF95_02656 | BBAA4_00934 | Diguanilate cyclase/phosphodiesterase, GGDEF domain protein                                      |                                                                           |                 |
| BBF95_00249 | BBAA4_02373 | Histidine kinase                                                                                 |                                                                           |                 |
| BBF95_02628 | BBAA4_01441 | ATP phosphoribosyltransferase                                                                    |                                                                           |                 |
| BBF95_00967 | BBAA4_00488 | Transcriptional regulator                                                                        |                                                                           |                 |
| BBF95_00745 | BBAA4_00511 | Transcriptional regulator, MerR family                                                           |                                                                           |                 |
| BBF95_03040 | BBAA4_00789 | XRE family transcriptional regulator                                                             |                                                                           |                 |
| BBF95_02707 | BBAA4_01409 | Transcriptional regulator, LacI family                                                           |                                                                           |                 |
| BBF95_03085 | BBAA4_01497 | IgIC2 protein                                                                                    |                                                                           |                 |
| BBF95_02417 | BBAA4_02289 | Mn-dependent transcriptional regulator MntR                                                      |                                                                           |                 |
| BBF95_00219 | BBAA4_02343 | Transcriptional regulator, GntR family                                                           |                                                                           |                 |
| BBF95_00248 | BBAA4_02372 | Transcription regulator                                                                          |                                                                           |                 |
| BBF95_00465 | BBAA4_02670 | Sugar-binding domain protein                                                                     |                                                                           |                 |
| BBF95_01652 | BBAA4_01476 | Bifunctional protein                                                                             |                                                                           |                 |
| BBF95_02533 | BBAA4_02708 | Stress-responsive transcriptional regulator PspC                                                 |                                                                           |                 |
| BBF95_01278 | BBAA4_03088 | Transcriptional regulator, LysR family                                                           |                                                                           |                 |
| BBF95_00224 | BBAA4_02348 | L-seryl-tRNA(Sec) selenium transferase-related protein, pyridoxal phosphate-dependent            | K01042 2.9.1.1                                                            |                 |
| BBF95_02929 | BBAA4_00188 | Predicted protein                                                                                |                                                                           |                 |
| BBF95_02937 | BBAA4_00826 | unknown                                                                                          |                                                                           |                 |
| BBF95_02532 | BBAA4_01080 | Fumarate reductase, flavoprotein subunit                                                         |                                                                           |                 |
| BBF95_02276 | BBAA4_01225 | unknown                                                                                          |                                                                           |                 |
| BBF95_02170 | BBAA4_01393 | Cell filamentation protein Fic                                                                   |                                                                           |                 |
| BBF95_02171 | BBAA4_01394 | Cell division protein Fic                                                                        |                                                                           |                 |
| BBF95_02172 | BBAA4_01414 | unknown                                                                                          |                                                                           |                 |
| BBF95_02040 | BBAA4_01483 | Copy-number control protein                                                                      |                                                                           |                 |
| BBF95_00048 | BBAA4_01504 | ABC transporter ATP-binding protein                                                              |                                                                           |                 |

|             |             |                                                                                         |         |
|-------------|-------------|-----------------------------------------------------------------------------------------|---------|
| BBF95_02785 | BBABA_01574 | Putative uncharacterized protein                                                        |         |
| BBF95_02787 | BBABA_01576 | Glycosyl transferase                                                                    |         |
| BBF95_02788 | BBABA_01577 | GGDEF domain protein                                                                    |         |
| BBF95_01776 | BBABA_01758 | DNA-binding protein with HIRAN domain                                                   |         |
| BBF95_01803 | BBABA_01826 | unknown                                                                                 |         |
| BBF95_00071 | BBABA_01884 | Thu/Ppf family protein                                                                  |         |
| BBF95_00048 | BBABA_02185 | ABC transporter ATP-binding protein                                                     |         |
| BBF95_02429 | BBABA_02314 | Lactobacillus brevis strain TMW 1.313 Scaffold_2_TMW1313, whole genome shotgun sequence |         |
| BBF95_02441 | BBABA_02326 | Orf5 protein                                                                            |         |
| BBF95_02022 | BBABA_02346 | PTS-associated protein                                                                  |         |
| BBF95_02023 | BBABA_02347 | Metallo-dependent hydrolase, subgroup 9                                                 | K01465  |
| BBF95_02025 | BBABA_02349 | 2-dehydro-3-deoxyphosphoacetate aldolase                                                | 3.5.2.3 |
| BBF95_00189 | BBABA_02528 | Extracellular protein                                                                   |         |
| BBF95_01399 | BBABA_02569 | Hypothetical cytosolic protein                                                          |         |
| BBF95_01400 | BBABA_02570 | Transglycosylase associated protein family                                              |         |
| BBF95_01401 | BBABA_02571 | Stress response regulator Gk24                                                          |         |
| BBF95_01403 | BBABA_02573 | Trypsin-like serine protease                                                            |         |
| BBF95_02537 | BBABA_02681 | Transcriptional regulator                                                               |         |
| BBF95_02539 | BBABA_02683 | Variovorax paradoxus strain MEDVA23 contig_Z2, whole genome shotgun sequence            |         |
| BBF95_02540 | BBABA_02684 | Metallo-beta-lactamase domain protein                                                   |         |
| BBF95_01980 | BBABA_02694 | Barstar (Barnase inhibitor)                                                             |         |
| BBF95_00075 | BBABA_02705 | Membrane protein                                                                        |         |
| BBF95_01657 | BBABA_00169 | Transposase                                                                             |         |
| BBF95_00355 | BBABA_00170 | Transposase                                                                             |         |
| BBF95_01686 | BBABA_00412 | Prophage P2a protein 53                                                                 |         |
| BBF95_01816 | BBABA_00956 | Prophage P2a protein 47                                                                 |         |
| BBF95_01817 | BBABA_00957 | Prophage P2a protein 46                                                                 |         |
| BBF95_01818 | BBABA_00958 | Prophage P2a protein 45                                                                 |         |
| BBF95_01819 | BBABA_00959 | Prophage P2a protein 45                                                                 |         |
| BBF95_01820 | BBABA_00960 | Prophage P2a protein 44                                                                 |         |
| BBF95_01821 | BBABA_00961 | Prophage P2a protein 43                                                                 |         |
| BBF95_01822 | BBABA_00962 | Prophage P1 protein 44                                                                  |         |
| BBF95_01823 | BBABA_00963 | Prophage P2a protein 41                                                                 |         |
| BBF95_01824 | BBABA_00964 | Prophage P2a protein 40                                                                 |         |
| BBF95_01825 | BBABA_00965 | Prophage P2a protein 39                                                                 |         |
| BBF95_01983 | BBABA_00967 | Prophage P2a protein 37                                                                 |         |
| BBF95_01985 | BBABA_00970 | Phage terminase, small subunit                                                          |         |
| BBF95_01986 | BBABA_00971 | Enterococcus gallinarum strain A6981 Contig019, whole genome shotgun sequence           |         |
| BBF95_01988 | BBABA_00973 | Prophage P2a protein 33                                                                 |         |
| BBF95_01991 | BBABA_00977 | Group-specific protein                                                                  |         |
| BBF95_01995 | BBABA_00981 | Hypothetical phage protein                                                              |         |
| BBF95_01339 | BBABA_00982 | Prophage protein                                                                        |         |
| BBF95_02000 | BBABA_00985 | Prophage Lp2 protein 23                                                                 |         |
| BBF95_02001 | BBABA_00986 | Bacteriophage antirepressor                                                             |         |
| BBF95_02004 | BBABA_00989 | Prophage Lp1 protein 19                                                                 |         |
| BBF95_02005 | BBABA_00990 | Recombinational DNA repair protein RecT (Prophage associated)                           | K07455  |
| BBF95_02006 | BBABA_00991 | Prophage Lp1 protein 17                                                                 |         |
| BBF95_02011 | BBABA_00996 | Prophage Lp1 protein 9                                                                  |         |
| BBF95_02012 | BBABA_00997 | Prophage Lp1 protein 8                                                                  |         |
| BBF95_02033 | BBABA_01001 | Prophage protein                                                                        | K15051  |
| BBF95_00025 | BBABA_01024 | Prophage Lp3 protein 8, helicase                                                        |         |
| BBF95_02485 | BBABA_01230 | Abi family protein                                                                      |         |
| BBF95_02487 | BBABA_01232 | Holin                                                                                   |         |
| BBF95_02489 | BBABA_01234 | Xdx family protein                                                                      |         |
| BBF95_02491 | BBABA_01236 | Prophage protein, minor tail protein                                                    |         |
| BBF95_02492 | BBABA_01237 | Prophage protein                                                                        |         |
| BBF95_02493 | BBABA_01238 | Prophage P2a protein 51                                                                 |         |
| BBF95_02494 | BBABA_01239 | Prophage P2a protein 50                                                                 |         |
| BBF95_01456 | BBABA_01253 | Lactobacillus brevis strain TMW 1.313 Scaffold_1_TMW1313, whole genome shotgun sequence |         |
| BBF95_02732 | BBABA_01433 | Transposase                                                                             |         |
| BBF95_00049 | BBABA_01505 | Putative transposase                                                                    |         |
| BBF95_00050 | BBABA_01506 | Transposase trp4                                                                        |         |
| BBF95_02617 | BBABA_01866 | Transposase                                                                             |         |
| BBF95_02616 | BBABA_01867 | Transposase subunit B (Fragment)                                                        |         |
| BBF95_02615 | BBABA_01868 | Transposase                                                                             |         |
| BBF95_00049 | BBABA_02186 | Putative transposase                                                                    |         |
| BBF95_02031 | BBABA_02293 | Transposase IS30 (Fragment)                                                             |         |
| BBF95_02028 | BBABA_02296 | Transposase                                                                             |         |
| BBF95_02432 | BBABA_02317 | Plasmid LBPp4, complete sequence                                                        |         |
| BBF95_02435 | BBABA_02320 | Plasmid LBPp4, complete sequence                                                        |         |
| BBF95_02436 | BBABA_02321 | Lactobacillus sakei strain KCA311 plasmid pKCA54, complete sequence                     |         |
| BBF95_00004 | BBABA_02327 | Transposase, IS30 family                                                                |         |
| BBF95_00006 | BBABA_02329 | Plasmid LBPp1, complete sequence                                                        |         |
| BBF95_02057 | BBABA_02332 | Plasmid LBPp1, complete sequence                                                        |         |
| BBF95_01398 | BBABA_02568 | Plasmid LBPp1, complete sequence                                                        |         |
| BBF95_00468 | BBABA_02673 | Transposase                                                                             |         |
| BBF95_00469 | BBABA_02674 | Plasmid pW56, complete sequence                                                         |         |
| BBF95_02534 | BBABA_02707 | Plasmid LBPp4, complete sequence                                                        |         |
| BBF95_01370 | BBABA_02760 | Prophage P2a protein 55                                                                 |         |
| BBF95_01371 | BBABA_02761 | Prophage P2a protein 54                                                                 |         |
| BBF95_01329 | BBABA_02779 | Phage terminase-like protein, large subunit                                             |         |
| BBF95_01332 | BBABA_02782 | Endonuclease                                                                            |         |
| BBF95_01339 | BBABA_02789 | Prophage protein                                                                        |         |
| BBF95_01340 | BBABA_02790 | Prophage protein                                                                        |         |
| BBF95_01342 | BBABA_02792 | Crossover junction endodeoxyribonuclease RusA                                           |         |
| BBF95_01353 | BBABA_02803 | Prophage protein                                                                        |         |
| BBF95_01354 | BBABA_02804 | Prophage Lp3 protein 4                                                                  |         |
| BBF95_01355 | BBABA_02805 | CRISPR-associated protein Cas2                                                          |         |
| BBF95_01357 | BBABA_02807 | Strain AB04 contig00007, whole genome shotgun sequence                                  |         |
| BBF95_01359 | BBABA_02809 | Prophage protein                                                                        |         |
| BBF95_01361 | BBABA_02811 | Putative uncharacterized protein ps106                                                  |         |
| BBF95_01364 | BBABA_02813 | Weissella cibaria strain AB3b contig000011, whole genome shotgun sequence               |         |
| BBF95_01365 | BBABA_02814 | Capsule polysaccharide export inner-membrane protein BexB                               |         |
| BBF95_02930 | BBABA_00819 | Prophage protein                                                                        |         |
| BBF95_02931 | BBABA_00820 | Pathogenicity island protein                                                            |         |
| BBF95_02932 | BBABA_00821 | Prophage Lp3 protein 8, helicase                                                        |         |
| BBF95_02936 | BBABA_00825 | Phage protein                                                                           |         |
| BBF95_00067 | BBABA_01084 | Uncultured bacterium extrachromosomal DNA RG101644                                      |         |
| BBF95_00083 | BBABA_01089 | Phage Integrase                                                                         |         |
| BBF95_00068 | BBABA_01083 | Integrase core domain protein                                                           |         |
| BBF95_00085 | BBABA_01091 | Putative integrase/recombinase                                                          |         |
| BBF95_01717 | BBABA_01739 | Draft genome                                                                            |         |
| BBF95_01396 | BBABA_02307 | Lactobacillus brevis strain TMW 1.313 Scaffold_6_TMW1313, whole genome shotgun sequence |         |
| BBF95_01395 | BBABA_02308 | Lactobacillus brevis strain TMW 1.313 Scaffold_2_TMW1313, whole genome shotgun sequence |         |
| BBF95_01394 | BBABA_02309 | DNA-directed RNA polymerase beta subunit                                                |         |
| BBF95_00076 | BBABA_01889 | Phage capsid and scaffold                                                               |         |
| BBF95_03091 | BBABA_02702 | Phage-related minor capsid protein                                                      |         |
| BBF95_00076 | BBABA_02703 | Phage capsid and scaffold                                                               |         |
| BBF95_00080 | BBABA_01893 | Prophage Lp1 protein 60 (Fragment)                                                      |         |
| BBF95_02030 | BBABA_02294 | ABC exporter ATP-binding subunit, DevA family                                           |         |
| BBF95_01397 | BBABA_02306 | Lipoyltransferase and lipocate-protein ligase                                           |         |
| BBF95_01405 | BBABA_02575 | Weissella cibaria strain AB3b contig000085, whole genome shotgun sequence               |         |
| BBF95_01406 | BBABA_02626 | Weissella cibaria strain AB3b contig000085, whole genome shotgun sequence               |         |

Mobilome: prophage, transposons, plasmid genes

**Supplementary Table 5.** Glucose, lactic acid, acetic acid and butyric acid contents (mM), variation of pH and growth capability (calculated following the formula: Log CFU mL<sup>-1</sup>after 24 h – Log CFU mL<sup>-1</sup>initial inoculums) recorded during the fermentation of four different media inoculated with 8.0 ± 0.2 Log CFU of *L. plantarum* O2T60C and S2T60C, and incubated for 48 h at 37 °C. Fermentation were carried out in (A) Phosphate Buffer Saline (PBS) with 0.45 % of glucose; (B) Dulbecco's Modified Eagle's Medium (DMEM) supplemented with 2 mM of L-glutamine and 0.45 % of glucose; (C) Dulbecco's Modified Eagle's Medium (DMEM) supplemented with 6 mM of L-glutamine and 0.45 % of glucose; (D) modified MRS (mMRS) supplemented with 0.45 % of glucose. Significant differences between the two strains O2T60C and S2T60D are highlighted with asterisk (T-test or Kolmogorov–Smirnov test; \* = p < 0.05; \*\* = p < 0.01; \*\*\* = p < 0.001).

| Media                                 | Hours | mM                  |                       |                     |                         |                     |                        |              |                    |              |              |                    |                        |             |
|---------------------------------------|-------|---------------------|-----------------------|---------------------|-------------------------|---------------------|------------------------|--------------|--------------------|--------------|--------------|--------------------|------------------------|-------------|
|                                       |       | Glucose             |                       | Lactic acid         |                         | Acetic acid         |                        | Butyric acid |                    | Δ Log CFU    |              | pH                 |                        |             |
|                                       |       | O2T60C              | S2T10D                | O2T60C              | S2T10D                  | O2T60C              | S2T10D                 | O2T60C       | S2T10D             | O2T60C       | S2T10D       | O2T60C             | S2T10D                 |             |
| <b>A</b><br><br>(PBS)                 | 0     | 27.48 ± 0.18        | 27.48 ± 0.18          | /                   | /                       | /                   | /                      | /            | /                  | /            | /            | /                  | 7.54 ± 0.09            | 7.54 ± 0.09 |
|                                       | 4     | 23.33 ± 0.10        | 23.42 ± 0.22          | 5.97 ± 0.04         | 4.71 ± 0.11             | 0.08 ± 0.01         | 0.08 ± 0.01            | n.d.         | n.d.               | 0.10 ± 0.04  | 0.06 ± 0.05  | 6.54 ± 0.03        | 6.57 ± 0.08            |             |
|                                       | 8     | 22.29 ± 0.08        | 22.46 ± 0.27          | 9.46 ± 0.31         | 10.15 ± 0.81            | 0.12 ± 0.01         | 0.24 ± 0.10            | n.d.         | n.d.               | -0.13 ± 0.08 | 0.07 ± 0.06  | 5.70 ± 0.28        | 5.76 ± 0.32            |             |
|                                       | 24    | 17.02 ± 1.02        | 17.55 ± 0.83          | 18.54 ± 1.49        | 19.15 ± 1.09            | 0.41 ± 0.02         | 0.39 ± 0.02            | n.d.         | n.d.               | -0.16 ± 0.11 | -0.08 ± 0.03 | 3.82 ± 0.10        | 3.74 ± 0.16            |             |
|                                       | 48    | 10.70 ± 1.17        | 9.61 ± 0.81           | 26.33 ± 1.50        | 30.75 ± 2.84            | 0.72 ± 0.05         | 0.78 ± 0.07            | n.d.         | n.d.               | -0.82 ± 0.23 | -0.35 ± 0.11 | 3.49 ± 0.12        | 3.48 ± 0.32            |             |
| <b>B</b><br><br>DMEM (2 mM<br>of Gln) | 0     | 27.48 ± 0.18        | 27.48 ± 0.18          | /                   | /                       | 0.15 ± 0.01         | 0.15 ± 0.01            | /            | /                  | 0.00 ± 0.00  | 0.00 ± 0.00  | 8.37 ± 0.07        | 8.37 ± 0.07            |             |
|                                       | 4     | 23.26 ± 0.15        | 24.17 ± 0.10          | 7.92 ± 0.03         | 7.98 ± 0.49             | 0.25 ± 0.01         | 0.26 ± 0.02            | n.d.         | n.d.               | 0.10 ± 0.01  | 0.10 ± 0.10  | 7.53 ± 0.00        | 7.49 ± 0.06            |             |
|                                       | 8     | 17.39 ± 0.79        | 20.27 ± 0.58          | 20.96 ± 0.56        | 16.70 ± 1.60            | 0.35 ± 0.09         | 0.24 ± 0.12            | n.d.         | n.d.               | 0.09 ± 0.11  | 0.09 ± 0.03  | 7.34 ± 0.11        | 7.26 ± 0.06            |             |
|                                       | 24    | n.d.                | n.d.                  | 45.15 ± 0.16        | 44.74 ± 0.16            | 1.95 ± 0.34         | 0.99 ± 0.04            | n.d.         | n.d.               | 0.41 ± 0.08  | 0.23 ± 0.05  | 4.73 ± 0.02        | 4.78 ± 0.06            |             |
|                                       | 48    | n.d.                | n.d.                  | 46.32 ± 1.13        | 45.12 ± 0.75            | 1.78 ± 0.36         | 2.49 ± 0.10            | n.d.         | n.d.               | -0.11 ± 0.15 | -0.54 ± 0.16 | 4.77 ± 0.05        | 4.76 ± 0.04            |             |
| <b>C</b><br><br>DMEM (6 mM<br>of Gln) | 0     | 27.48 ± 0.18        | 27.48 ± 0.18          | /                   | /                       | /                   | /                      | /            | /                  | 0.00 ± 0.00  | 0.00 ± 0.00  | 7.92 ± 0.00        | 7.92 ± 0.00            |             |
|                                       | 4     | 23.54 ± 0.36        | 22.62 ± 0.60          | 6.34 ± 0.32         | 8.04 ± 1.01             | 0.14 ± 0.00         | 0.15 ± 0.01            | n.d.         | <b>0.52 ± 0.16</b> | 0.02 ± 0.02  | 0.06 ± 0.11  | 7.47 ± 0.08        | 7.42 ± 0.15            |             |
|                                       | 8     | <b>22.08 ± 0.13</b> | <b>17.15 ± 1.16</b> * | 10.24 ± 0.23        | 17.95 ± 4.84            | 0.23 ± 0.04         | 0.32 ± 0.08            | n.d.         | <b>1.43 ± 0.44</b> | 0.07 ± 0.07  | 0.17 ± 0.13  | 7.50 ± 0.08        | 7.02 ± 0.17            |             |
|                                       | 24    | <b>13.35 ± 0.28</b> | n.d.                  | <b>22.96 ± 1.24</b> | <b>38.03 ± 1.90</b> *** | 0.46 ± 0.02         | 0.70 ± 0.07            | n.d.         | <b>3.07 ± 0.33</b> | -0.01 ± 0.09 | 0.09 ± 0.12  | <b>6.74 ± 0.07</b> | <b>4.64 ± 0.23</b> *** |             |
|                                       | 48    | n.d.                | n.d.                  | 39.88 ± 2.52        | 40.89 ± 0.37            | <b>0.86 ± 0.06</b>  | <b>1.72 ± 0.06</b> *** | n.d.         | <b>3.55 ± 0.23</b> | -0.21 ± 0.06 | -0.57 ± 0.49 | <b>4.59 ± 0.08</b> | <b>4.38 ± 0.01</b> *   |             |
| <b>D</b><br><br>mMRS                  | 0     | 27.48 ± 0.18        | 27.48 ± 0.18          | /                   | /                       | 6.89 ± 0.19         | 6.89 ± 0.19            | /            | /                  | 0.00 ± 0.00  | 0.00 ± 0.00  | 6.41 ± 0.03        | 6.41 ± 0.03            |             |
|                                       | 4     | n.d.                | n.d.                  | 52.04 ± 0.21        | 47.20 ± 0.48            | 8.84 ± 0.40         | 8.94 ± 0.25            | n.d.         | n.d.               | 0.86 ± 0.11  | 0.88 ± 0.14  | <b>4.26 ± 0.00</b> | <b>4.34 ± 0.02</b> *   |             |
|                                       | 8     | n.d.                | n.d.                  | 57.92 ± 0.40        | 52.73 ± 3.14            | 13.99 ± 0.11        | 12.00 ± 2.71           | n.d.         | n.d.               | 0.82 ± 0.02  | 0.95 ± 0.05  | 4.30 ± 0.03        | 4.27 ± 0.02            |             |
|                                       | 24    | n.d.                | n.d.                  | 57.73 ± 0.18        | 56.37 ± 0.42            | <b>20.13 ± 0.29</b> | <b>22.34 ± 0.22</b> *  | n.d.         | n.d.               | 0.05 ± 0.25  | -0.50 ± 0.08 | 4.26 ± 0.03        | 4.30 ± 0.05            |             |
|                                       | 48    | n.d.                | n.d.                  | 58.02 ± 0.53        | 56.03 ± 0.32            | 21.29 ± 0.24        | 22.88 ± 0.27           | n.d.         | n.d.               | -1.23 ± 0.17 | -1.01 ± 0.04 | 4.29 ± 0.04        | 4.28 ± 0.04            |             |

**Supplementary Table 6.** Complete list of reactions and genes (*L. plantarum* S2T10D, *L. plantarum* O2T60C) involved in glutamine uptake and glutamine/glutamate metabolism of *L. plantarum*; genes nomenclature is based on the reference genome WCFS1.

|                                        | Genes WCFS1   | S2          | Locust tags<br>O2                                              | Annotation                                                        | EC by kass        | nSNPs | Provean                       | Reactions no. |
|----------------------------------------|---------------|-------------|----------------------------------------------------------------|-------------------------------------------------------------------|-------------------|-------|-------------------------------|---------------|
| ABC transporter                        | <i>glnP</i>   | BBF95_02825 | BBA85_01180                                                    | Glutamine ABC transporter, substrate binding and permease protein |                   | 2     |                               |               |
|                                        | <i>glnQ1</i>  | BBF95_02826 | BBA85_01181                                                    | ABC-type polar amino acid transport system, ATPase component      |                   |       |                               |               |
|                                        | <i>glnQ2</i>  | BBF95_02893 | BBA85_01244                                                    | ABC-type polar amino acid transport system, ATPase component      |                   | 1     | P2315 (-7.602)                |               |
|                                        | <i>glnH1</i>  | BBF95_02894 | BBA85_01245                                                    | Glutamine ABC transporter, substrate binding protein              |                   |       |                               |               |
|                                        | <i>glnM</i>   | BBF95_02895 | BBA85_01246                                                    | Glutamine ABC transporter, permease protein                       |                   |       |                               |               |
|                                        | <i>glnP1</i>  | BBF95_02896 | BBA85_01247                                                    | Glutamine ABC transporter, permease protein                       |                   |       |                               |               |
|                                        | <i>glnPH2</i> | BBF95_02581 | BBA85_00659                                                    | Glutamine ABC transporter, substrate binding and permease protein |                   |       |                               |               |
|                                        | <i>glnQ3</i>  | BBF95_02580 | BBA85_00658                                                    | ABC-type polar amino acid transport system, ATPase component      |                   |       |                               |               |
|                                        | <i>glnP2</i>  | BBF95_00438 | BBA85_01355                                                    | Glutamine ABC transporter, permease protein                       |                   |       |                               |               |
|                                        | <i>glnQ4</i>  | BBF95_00437 | BBA85_01354                                                    | ABC-type polar amino acid transport system, ATPase component      |                   | 1     |                               |               |
| <i>glnH2</i>                           | BBF95_00436   | BBA85_01353 | Glutamine/histidine ABC transporter, substrate binding protein |                                                                   |                   |       |                               |               |
| Central glutamine/glutamate metabolism | <i>glimS1</i> | BBF95_02844 | BBA85_01198                                                    | Glutamine--fructose-6-phosphate aminotransferase [isomerizing]    | 2.6.1.16          |       |                               | R00768        |
|                                        | <i>glimS2</i> | BBF95_02069 | BBA85_00196                                                    | Glutamine--fructose-6-phosphate transaminase [isomerizing]        | 2.6.1.16          | 1     |                               | R00768        |
|                                        | <i>naoB</i>   | BBF95_01219 | BBA85_01709                                                    | Glucosamine-6-phosphate deaminase                                 | 3.5.99.6          |       |                               | R00765        |
|                                        | <i>glnR</i>   | BBF95_00573 | BBA85_01621                                                    | Glutamine synthetase repressor                                    |                   |       |                               |               |
|                                        | <i>glnA</i>   | BBF95_00574 | BBA85_01622                                                    | Glutamine synthetase                                              | 6.3.1.2           |       |                               | R00253        |
|                                        | <i>gdh</i>    | BBF95_01174 | BBA85_02355                                                    | Glutamate dehydrogenase                                           | 1.4.1.4           | 10    | D408A (-2.617)                | R00248        |
|                                        | <i>gadB</i>   | BBF95_02127 | BBA85_00266                                                    | Glutamate decarboxylase                                           | 4.1.1.15          | 3     | V167A (-3.806)                | R00261        |
| Purine metabolism                      | <i>purF</i>   | BBF95_01902 | BBA85_00555                                                    | Amidophosphoribosyltransferase                                    | 2.4.2.14          | 1     |                               | R01072        |
|                                        | <i>purM</i>   | BBF95_01901 | BBA85_00554                                                    | Phosphoribosylformylglycinamide cyclo-ligase                      | 6.3.3.1           | 6     | P3035 (-4.064)                | R04463        |
|                                        | <i>guaA</i>   | BBF95_02500 | BBA85_01271                                                    | GMP synthase [glutamine-hydrolyzing]                              | 6.3.5.2           | 1     |                               | R01231        |
| Pyrimidine, arginine metabolism        | <i>pyrG</i>   | BBF95_00203 | BBA85_00873                                                    | CTP synthase                                                      | 6.3.4.2           |       |                               | R00573        |
|                                        | <i>carB</i>   | BBF95_00337 | BBA85_00897                                                    | Carbamoyl-phosphate synthase large chain                          | 6.3.5.5           | 9     |                               | R00256/R00575 |
|                                        | <i>carA</i>   | BBF95_00338 | BBA85_00898                                                    | Carbamoyl-phosphate synthase small chain                          | 6.3.5.5           | 4     |                               | R00256/R00575 |
|                                        | <i>pyrAA2</i> | BBF95_01543 | BBA85_03099                                                    | Carbamoyl-phosphate synthase small chain                          | 6.3.5.5           | 1     |                               | R00256/R00575 |
|                                        | <i>pyrAB</i>  | BBF95_01885 | BBA85_02650                                                    | Carbamoyl-phosphate synthase large chain                          | 6.3.5.5           | 2     |                               | R00256/R00575 |
|                                        | <i>pyrAA</i>  | BBF95_01886 | BBA85_02651                                                    | Carbamoyl-phosphate synthase small chain                          | 6.3.5.5           | 1     |                               | R00256/R00575 |
|                                        | <i>argJ</i>   | BBF95_00340 | BBA85_00500                                                    | Arginine biosynthesis bifunctional protein ArgJ                   | 2.3.1.35 2.3.1.1  | 1     |                               | R00259        |
|                                        | <i>gatC</i>   | BBF95_01152 | BBA85_01063                                                    | Aspartyl/glutamyl-tRNA(Asn/Gln) amidotransferase subunit C        | 6.3.5.6 6.3.5.7   | 1     |                               | R03905        |
| Aminoacyl-tRNA biosynthesis            | <i>gatB</i>   | BBF95_01154 | BBA85_01065                                                    | Aspartyl/glutamyl-tRNA(Asn/Gln) amidotransferase subunit B        | 6.3.5.6 6.3.5.7   |       |                               | R03905        |
|                                        | <i>gltX</i>   | BBF95_00520 | BBA85_01872                                                    | Glutamate--tRNA ligase                                            | 6.1.1.24          |       |                               | R03651        |
|                                        | <i>proB</i>   | BBF95_02249 | BBA85_01760                                                    | Glutamate 5-kinase                                                | 2.7.2.11          | 1     |                               | R00239        |
| Arginine metabolism                    | <i>argD</i>   | BBF95_00342 | BBA85_00902                                                    | Acetylornithine aminotransferase                                  | 2.6.1.11          | 3     |                               | R02283        |
|                                        | <i>asnB1</i>  | BBF95_00420 | BBA85_02037                                                    | Asparagine synthase (Glutamine-hydrolyzing)                       | 6.3.5.4           | 2     |                               | R00578        |
| Aspartate metabolism                   | <i>asnB2</i>  | BBF95_01231 | BBA85_02450                                                    | Asparagine synthase (Glutamine-hydrolyzing)                       | 6.3.5.4           | 5     | D37Y (-6.960)                 | R00578        |
| Folate metabolism                      | <i>folC1</i>  | BBF95_00445 | BBA85_01362                                                    | Folylpolyglutamate synthase                                       | 6.3.2.12 6.3.2.17 | 4     | A347T (-2.867); G14D (-5.278) | R00942        |
|                                        | <i>folC2</i>  | BBF95_03046 | BBA85_02001                                                    | Folylpolyglutamate synthase / dihydrofolate synthase              | 6.3.2.12 6.3.2.17 | 3     |                               | R00942        |
| Glutathione metabolism                 | <i>gshAB</i>  | BBF95_00448 | BBA85_01365                                                    | Glutamate--cysteine ligase                                        | 6.3.2.2           | 1     |                               | R00894        |
|                                        | <i>gshAB</i>  | BBF95_00466 | BBA85_01381                                                    | GshAB protein                                                     | 6.3.2.2           | 7     |                               | R10993        |
| Gly/Ser/Thr metabolism                 | <i>serC</i>   | BBF95_01201 | BBA85_02794                                                    | Phosphoserine aminotransferase                                    | 2.6.1.52          |       |                               | R05085        |
| Histidine biosynthesis                 | <i>hisF</i>   | BBF95_00733 | BBA85_01559                                                    | Imidazole glycerol phosphate synthase subunit HisF                | 4.1.3.-           |       |                               | R04558        |
|                                        | <i>hisH</i>   | BBF95_00735 | BBA85_01561                                                    | Imidazole glycerol phosphate synthase subunit HisH                | 2.4.2.-           | 2     |                               | R04558        |
| Peptidoglycan biosynthesis             | <i>murD</i>   | BBF95_00719 | BBA85_00725                                                    | UDP-N-acetylmuramoylalanine--D-glutamate ligase                   | 6.3.2.9           | 2     |                               | R02783        |
|                                        | <i>murI</i>   | BBF95_01004 | BBA85_01322                                                    | Glutamate racemase                                                | 5.1.1.3           |       |                               | R00260        |
| Phe/Tyr/Trp metabolism                 | <i>trpE</i>   | BBF95_00928 | BBA85_01687                                                    | TrpE protein                                                      | 4.1.3.27          | 9     |                               | R00986        |
|                                        | <i>trpGD</i>  | BBF95_00929 | BBA85_01688                                                    | Anthranilate synthase, component II                               | 4.1.3.27          |       |                               | R00986        |
|                                        | <i>hisC</i>   | BBF95_00730 | BBA85_01556                                                    | Histidinol-phosphate aminotransferase                             | 2.6.1.9           | 2     |                               | R03243        |
| Amino acid metabolisms                 | <i>livE</i>   | BBF95_02478 | BBA85_01422                                                    | Branched-chain-amino-acid aminotransferase                        | 2.6.1.42          |       |                               | R02199        |

---

**Reactions**

---

---

L-Glutamine + D-Fructose 6-phosphate <=> L-Glutamate + D-Glucosamine 6-phosphate  
L-Glutamine + D-Fructose 6-phosphate => L-Glutamate + D-Glucosamine 6-phosphate  
D-Glucosamine 6-phosphate + H2O => D-Fructose 6-phosphate + Ammonia

ATP + L-Glutamate + Ammonia => ADP + Orthophosphate + L-Glutamine  
L-Glutamate + NADP+ + H2O <=> 2-Oxoglutarate + Ammonia + NADPH + H+  
L-Glutamate => 4-Aminobutanoate + CO2

---

L-Glutamine + 5-Phospho-alpha-D-ribose 1-diphosphate + H2O <=> 5-Phosphoribosylamine + Diphosphate + L-Glutamate  
ATP + 5'-Phosphoribosyl-N-formylglycinamide + L-Glutamine + H2O => ADP + Orthophosphate + 2-(Formamido)-N1-(5'-phosphoribosyl)acetamidine + L-Glutamate  
ATP + Xanthosine 5'-phosphate + L-Glutamine + H2O => AMP + Diphosphate + GMP + L-Glutamate

---

ATP + UTP + L-Glutamine + H2O => ADP + Orthophosphate + CTP + L-Glutamate

L-Glutamine + H2O => L-Glutamate + Ammonia/ATP + L-Glutamine + HCO3- + H2O => 2 ADP + Orthophosphate + L-Glutamate + Carbamoyl phosphate  
L-Glutamine + H2O => L-Glutamate + Ammonia/ATP + L-Glutamine + HCO3- + H2O => 2 ADP + Orthophosphate + L-Glutamate + Carbamoyl phosphate  
L-Glutamine + H2O => L-Glutamate + Ammonia/ATP + L-Glutamine + HCO3- + H2O => 2 ADP + Orthophosphate + L-Glutamate + Carbamoyl phosphate  
L-Glutamine + H2O => L-Glutamate + Ammonia/ATP + L-Glutamine + HCO3- + H2O => 2 ADP + Orthophosphate + L-Glutamate + Carbamoyl phosphate  
L-Glutamine + H2O => L-Glutamate + Ammonia/ATP + L-Glutamine + HCO3- + H2O => 2 ADP + Orthophosphate + L-Glutamate + Carbamoyl phosphate  
Acetyl-CoA + L-Glutamate => CoA + N-Acetyl-L-glutamate

---

Glutaminyl-tRNA + L-Glutamate + Orthophosphate + ADP => L-Glutamyl-tRNA(Gln) + L-Glutamine + ATP + H2O  
Glutaminyl-tRNA + L-Glutamate + Orthophosphate + ADP => L-Glutamyl-tRNA(Gln) + L-Glutamine + ATP + H2O  
ATP + L-Glutamate + tRNA(Gln) => AMP + Diphosphate + L-Glutamyl-tRNA(Gln)

---

ATP + L-Glutamate <=> ADP + L-Glutamyl 5-phosphate

N-Acetyloronithine + 2-Oxoglutarate <= N-Acetyl-L-glutamate 5-semialdehyde + L-Glutamate

---

ATP + L-Aspartate + L-Glutamine + H2O <=> AMP + Diphosphate + L-Asparagine + L-Glutamate

---

ATP + L-Aspartate + L-Glutamine + H2O <=> AMP + Diphosphate + L-Asparagine + L-Glutamate

---

ATP + Tetrahydrofolate + L-Glutamate => ADP + Orthophosphate + THF-L-glutamate

---

ATP + Tetrahydrofolate + L-Glutamate => ADP + Orthophosphate + THF-L-glutamate

---

ATP + L-Glutamate + L-Cysteine <=> ADP + Orthophosphate + gamma-L-Glutamyl-L-cysteine

---

ATP + L-Glutamate + (S)-2-Aminobutanoate <=> ADP + Orthophosphate + gamma-L-Glutamyl-L-2-aminobutyrate

---

O-Phospho-4-hydroxy-L-threonine + 2-Oxoglutarate <=> 2-Oxo-3-hydroxy-4-phosphobutanoate + L-Glutamate

---

C04916 + L-Glutamine => C04666 + C04677 + L-Glutamate

---

C04916 + L-Glutamine => C04666 + C04677 + L-Glutamate

---

ATP + UDP-N-acetylmuramoyl-L-alanine + D-Glutamate <=> ADP + Orthophosphate + UDP-N-acetylmuramoyl-L-alanyl-D-glutamate

---

L-Glutamate <=> D-Glutamate

---

Chorismate + L-Glutamine => Anthranilate + Pyruvate + L-Glutamate

---

Chorismate + L-Glutamine => Anthranilate + Pyruvate + L-Glutamate

---

L-Histidinol phosphate + 2-Oxoglutarate <=> 3-(Imidazol-4-yl)-2-oxopropyl phosphate + L-Glutamate

---

L-Isoleucine + 2-Oxoglutarate <=> (S)-3-Methyl-2-oxopentanoic acid + L-Glutamate

---
